# Supplementary material for: Muscle MRI and functional outcome measures in Becker muscular dystrophy
Source: PubMed Central journal article supplement (PMC5700122; doi:10.1038/s41598-017-16170-2), 2017-11-22
Supplement: 41598_2017_16170_MOESM1_ESM.pdf [file 41598_2017_16170_MOESM1_ESM.pdf]

**Supplementary Information for the manuscript:**

**Muscle MRI and functional outcome measures in Becker muscular dystrophy**

Andrea Barp, MD<sup>1\*</sup>; Luca Bello, MD, PhD<sup>1\*</sup>; Luca Caumo, MD<sup>1</sup>; Paola Campadello, MD<sup>1</sup>; Claudio Semplicini, MD, PhD<sup>1</sup>; Annalisa Lazzarotto, MD<sup>1</sup>; Gianni Sorarù, MD, PhD<sup>1</sup>; Chiara Calore, MD, PhD<sup>2</sup>; Alessandro Rampado, MRT<sup>3</sup>; Raffaella Motta, MD<sup>3</sup>; Roberto Stramare, MD<sup>3</sup>; Elena Pegoraro, MD, PhD<sup>1†</sup>.

\*These authors contributed equally to this work

1 Department of Neurosciences (DNS), University of Padova, Padova (Italy)

2 Department of Cardiac, Thoracic and Vascular Sciences, University of Padova, Padova (Italy)

3 Departmente of Medicine (DIMED), Istitute of Radiology, University of Padova, Padova (Italy)

†to whom correspondence should be addressed:

Elena Pegoraro, M.D. Ph.D., Neuromuscular Center, Department of Neurosciences NDS, University of Padova, 35128 Padova, Italy; tel. 39-049-8213622; fax. 39-049-8751770; e-mail: [elena.pegoraro@unipd.it](mailto:elena.pegoraro@unipd.it).

Supplementary table 1. Details of T1w Mercuri scores in 3 upper right limb and 22 lower right limb muscles in 51 BMD patients

| Mutation group                           | Mutation           | Age | Muscles |                   |         |                 |                |                 |           |                      |                  |                    |                 |                |          |           |           |                |                |                 |                   |                    |          |        | Number of muscles involved |                    |                    |                    |
|------------------------------------------|--------------------|-----|---------|-------------------|---------|-----------------|----------------|-----------------|-----------|----------------------|------------------|--------------------|-----------------|----------------|----------|-----------|-----------|----------------|----------------|-----------------|-------------------|--------------------|----------|--------|----------------------------|--------------------|--------------------|--------------------|
|                                          |                    |     | Deltoid | Biceps brachialis | Triceps | Gluteus maximus | Gluteus medius | Gluteus minimus | Ileopsoas | Tensor fasciae latae | Vastus lateralis | Vastus intermedius | Vastus medialis | Rectus femoris | Gracilis | Sartorius | Adductors | Biceps femoris | Semitendinosus | Semimembranosus | Tibialis anterior | Extensor digitorum | Peroneus | Soleus |                            | Gastrocnemius lat. | Gastrocnemius med. | Tibialis posterior |
| del 45-x                                 | del 45-47          | 11  | 0       | 0                 | 0       | 1               | 1              | 1               | 0         | 0                    | 1                | 0                  | 1               | 1              | 0        | 1         | 2b        | 2b             | 2a             | 2a              | 1                 | 1                  | 1        | 0      | 1                          | 0                  | 0                  | 15                 |
|                                          |                    | 34  | 1       | 2b                | 2a      | 3               | 2a             | 1               | 0         | 2a                   | 3                | 4                  | 4               | 3              | 0        | 0         | 1         | 4              | 2b             | 4               | 1                 | 1                  | 1        | 1      | 3                          | 4                  | 0                  | 21                 |
|                                          |                    | 41  | 2b      | 2b                | 2a      | 3               | 2b             | 2b              | 1         | 1                    | 3                | 3                  | 3               | 3              | 0        | 1         | 2a        | 4              | 3              | 4               | 2b                | 2b                 | 2b       | 2b     | 2b                         | 2b                 | 1                  | 24                 |
|                                          |                    | 45  | 2a      | 3                 | 2b      | 4               | 4              | 3               | 4         | 4                    | 4                | 4                  | 4               | 4              | 4        | 4         | 4         | 4              | 4              | 4               | 3                 | 2a                 | 2b       | 3      | 4                          | 4                  | 2a                 | 25                 |
|                                          |                    | 47  | 2b      | 2b                | 2b      | 4               | 4              | 4               | 1         | 2b                   | 4                | 4                  | 4               | 4              | 4        | 1         | 4         | 4              | 4              | 4               | 2b                | 3                  | 3        | 3      | 4                          | 4                  | 2a                 | 25                 |
|                                          |                    | 47  | 3       | 4                 | 4       | 4               | 4              | 4               | 4         | 4                    | 4                | 4                  | 4               | 4              | 3        | 4         | 4         | 4              | 4              | 4               | 4                 | 4                  | 4        | 4      | 4                          | 4                  | 4                  | 25                 |
|                                          | 56                 | 2a  | 3       | 3                 | 4       | 4               | 4              | 4               | 4         | 4                    | 4                | 4                  | 4               | 4              | 4        | 4         | 4         | 4              | 4              | 4               | 3                 | 3                  | 3        | 4      | 4                          | 2b                 | 25                 |                    |
|                                          | del 45-48          | 9   | 0       | 0                 | 0       | 0               | 1              | 0               | 0         | 0                    | 1                | 1                  | 2a              | 0              | 0        | 0         | 3         | 1              | 1              | 1               | 0                 | 0                  | 0        | 1      | 1                          | 1                  | 0                  | 11                 |
|                                          |                    | 12  | 1       | 1                 | 1       | 2a              | 2a             | 1               | 0         | 0                    | 2b               | 2a                 | 2a              | 1              | 1        | 1         | 2b        | 3              | 1              | 2b              | 2b                | 2b                 | 3        | 2b     | 2b                         | 2b                 | 2a                 | 23                 |
|                                          |                    | 24  | 0       | 0                 | 0       | 0               | 1              | 1               | 0         | 0                    | 2b               | 2b                 | 2b              | 0              | 0        | 0         | 2a        | 2a             | 1              | 2a              | 0                 | 0                  | 0        | 0      | 0                          | 1                  | 0                  | 10                 |
|                                          |                    | 27  | 0       | 0                 | 0       | 0               | 0              | 1               | 0         | 0                    | 0                | 0                  | 0               | 0              | 0        | 0         | 2a        | 2a             | 1              | 1               | 0                 | 0                  | 0        | 0      | 1                          | 1                  | 0                  | 7                  |
|                                          |                    | 37  | 0       | 0                 | 1       | 1               | 1              | 1               | 0         | 0                    | 3                | 3                  | 3               | 2b             | 0        | 0         | 0         | 4              | 2a             | 4               | 0                 | 0                  | 1        | 1      | 4                          | 4                  | 0                  | 15                 |
|                                          |                    | 37  | 1       | 2a                | 1       | 3               | 2b             | 2b              | 1         | 1                    | 3                | 3                  | 3               | 3              | 1        | 1         | 2b        | 3              | 3              | 3               | 2a                | 2a                 | 2b       | 2a     | 2b                         | 2b                 | 1                  | 25                 |
|                                          |                    | 39  | 0       | 1                 | 2b      | 4               | 4              | 4               | 2a        | 2a                   | 3                | 3                  | 3               | 2b             | 1        | 1         | 2b        | 4              | 2b             | 4               | 4                 | 1                  | 3        | 2b     | 2b                         | 3                  | 0                  | 23                 |
|                                          |                    | 40  | 1       | 1                 | 2b      | 3               | 1              | 1               | 1         | 1                    | 3                | 3                  | 3               | 2b             | 1        | 2a        | 4         | 4              | 3              | 4               | 2a                | 2a                 | 2a       | 1      | 3                          | 3                  | 0                  | 24                 |
|                                          |                    | 61  | 2a      | 3                 | 3       | 4               | 4              | 4               | 2b        | 4                    | 4                | 4                  | 4               | 4              | 4        | 4         | 4         | 4              | 4              | 4               | 2a                | 2a                 | 3        | 3      | 4                          | 4                  | 2a                 | 25                 |
|                                          |                    | 69  | 2b      | 4                 | 3       | 4               | 4              | 4               | 0         | 4                    | 4                | 4                  | 4               | 4              | 4        | 4         | 1         | 4              | 4              | 4               | 4                 | 3                  | 2b       | 2b     | 4                          | 4                  | 4                  | 24                 |
|                                          | del 45-49          | 19  | 0       | 0                 | 0       | 2b              | 2a             | 2a              | 0         | 2a                   | 3                | 3                  | 3               | 2b             | 0        | 0         | 2b        | 2a             | 2a             | 4               | 0                 | 0                  | 2a       | 2a     | 2a                         | 1                  | 1                  | 17                 |
| del 45-55                                | 7                  | 0   | 0       | 0                 | 0       | 0               | 0              | 0               | 0         | 0                    | 0                | 0                  | 0               | 0              | 1        | 0         | 0         | 0              | 0              | 0               | 0                 | 0                  | 0        | 0      | 0                          | 0                  | 1                  |                    |
| 52                                       | 0                  | 0   | 0       | 1                 | 2a      | 1               | 0              | 1               | 1         | 1                    | 1                | 1                  | 1               | 1              | 1        | 2a        | 2a        | 2a             | 1              | 1               | 1                 | 2a                 | 2a       | 2a     | 2a                         | 0                  | 20                 |                    |
| del 48                                   | del 48             | 8   | 0       | 0                 | 0       | 0               | 0              | 0               | 0         | 0                    | 0                | 0                  | 0               | 0              | 0        | 0         | 0         | 0              | 0              | 0               | 0                 | 0                  | 0        | 0      | 0                          | 0                  | 0                  | 0                  |
|                                          |                    | 12  | 0       | 0                 | 0       | 0               | 0              | 0               | 0         | 0                    | 0                | 0                  | 0               | 0              | 0        | 0         | 0         | 0              | 0              | 0               | 0                 | 0                  | 0        | 1      | 1                          | 1                  | 0                  | 3                  |
|                                          |                    | 14  | 0       | 0                 | 0       | 0               | 0              | 0               | 0         | 0                    | 0                | 0                  | 0               | 0              | 0        | 0         | 0         | 0              | 0              | 0               | 0                 | 0                  | 0        | 0      | 0                          | 0                  | 0                  | 0                  |
|                                          |                    | 14  | 0       | 0                 | 0       | 0               | 0              | 0               | 0         | 0                    | 0                | 0                  | 0               | 0              | 0        | 0         | 0         | 0              | 0              | 0               | 0                 | 0                  | 0        | 0      | 0                          | 0                  | 0                  | 0                  |
|                                          |                    | 40  | 0       | 0                 | 0       | 0               | 0              | 0               | 0         | 0                    | 0                | 0                  | 0               | 0              | 0        | 0         | 0         | 0              | 0              | 0               | 0                 | 0                  | 0        | 0      | 0                          | 0                  | 0                  | 0                  |
|                                          |                    | 43  | 0       | 0                 | 0       | 0               | 0              | 0               | 0         | 0                    | 0                | 0                  | 0               | 0              | 0        | 0         | 0         | 0              | 0              | 0               | 0                 | 0                  | 0        | 0      | 0                          | 0                  | 0                  | 0                  |
| del x-51                                 | del 34-51          | 50  | 0       | 0                 | 0       | 0               | 0              | 0               | 0         | 0                    | 0                | 0                  | 0               | 0              | 0        | 1         | 1         | 1              | 1              | 0               | 0                 | 0                  | 0        | 0      | 2a                         | 0                  | 5                  |                    |
|                                          | del 45-51          | 9   | 0       | 0                 | 0       | 0               | 0              | 0               | 0         | 0                    | 0                | 0                  | 0               | 0              | 0        | 0         | 0         | 0              | 0              | 0               | 0                 | 0                  | 0        | 0      | 0                          | 0                  | 0                  |                    |
|                                          | 16                 | 0   | 0       | 0                 | 0       | 0               | 0              | 0               | 0         | 0                    | 0                | 0                  | 0               | 0              | 0        | 0         | 0         | 0              | 0              | 0               | 0                 | 0                  | 0        | 0      | 0                          | 0                  | 0                  |                    |
|                                          | 25                 | 0   | 0       | 0                 | 0       | 0               | 0              | 0               | 0         | 0                    | 0                | 0                  | 0               | 0              | 0        | 0         | 0         | 0              | 0              | 0               | 0                 | 0                  | 0        | 0      | 0                          | 0                  | 0                  |                    |
|                                          | del 48-51          | 42  | 0       | 0                 | 0       | 0               | 0              | 0               | 0         | 0                    | 0                | 0                  | 0               | 0              | 0        | 0         | 0         | 0              | 0              | 0               | 0                 | 0                  | 0        | 0      | 0                          | 0                  | 0                  |                    |
| del 50-51                                | 13                 | 0   | 0       | 0                 | 0       | 0               | 0              | 0               | 1         | 1                    | 1                | 0                  | 0               | 1              | 1        | 1         | 1         | 1              | 0              | 0               | 0                 | 1                  | 1        | 1      | 0                          | 11                 |                    |                    |
| 15                                       | 0                  | 0   | 0       | 0                 | 0       | 0               | 0              | 0               | 0         | 0                    | 0                | 0                  | 0               | 0              | 0        | 0         | 0         | 0              | 0              | 0               | 0                 | 0                  | 0        | 0      | 0                          | 0                  |                    |                    |
| Other                                    | c.10507-10508delAG | 17  | 1       | 1                 | 1       | 4               | 4              | 4               | 2b        | 3                    | 3                | 4                  | 4               | 3              | 2a       | 2a        | 2a        | 3              | 2a             | 4               | 1                 | 1                  | 2a       | 1      | 2a                         | 2a                 | 0                  | 24                 |
|                                          |                    | 21  | 3       | 2b                | 3       | 4               | 4              | 4               | 4         | 3                    | 4                | 4                  | 4               | 4              | 2b       | 3         | 4         | 4              | 3              | 4               | 2a                | 2a                 | 2b       | 2a     | 1                          | 1                  | 0                  | 24                 |
|                                          | p.Gly1433Gly       | 35  | 0       | 0                 | 0       | 0               | 0              | 0               | 0         | 0                    | 0                | 0                  | 0               | 0              | 0        | 0         | 0         | 0              | 0              | 0               | 0                 | 0                  | 0        | 0      | 0                          | 0                  | 0                  | 0                  |
|                                          |                    | 46  | 0       | 0                 | 0       | 0               | 0              | 0               | 0         | 0                    | 0                | 0                  | 0               | 0              | 0        | 0         | 1         | 3              | 0              | 0               | 0                 | 0                  | 0        | 1      | 0                          | 1                  | 0                  | 4                  |
|                                          | c.676-678delAAG    | 48  | 0       | 2a                | 2a      | 3               | 2b             | 2b              | 1         | 3                    | 3                | 3                  | 3               | 2b             | 1        | 0         | 2b        | 3              | 2a             | 2b              | 2b                | 2b                 | 2b       | 3      | 4                          | 4                  | 2a                 | 23                 |
|                                          |                    | 52  | 2a      | 1                 | 2b      | 4               | 4              | 4               | 0         | 2b                   | 4                | 4                  | 4               | 2b             | 0        | 1         | 4         | 4              | 3              | 4               | 2b                | 2b                 | 2b       | 2b     | 2b                         | 4                  | 1                  | 23                 |
|                                          | 54                 | 1   | 1       | 1                 | 3       | 2b              | 2b             | 2a              | 3         | 4                    | 4                | 4                  | 4               | 2b             | 0        | 1         | 4         | 3              | 2b             | 3               | 2a                | 2b                 | 2b       | 2b     | 4                          | 4                  | 2a                 | 24                 |
|                                          | del 10-25          | 26  | 0       | 0                 | 0       | 1               | 1              | 0               | 0         | 0                    | 1                | 1                  | 1               | 1              | 1        | 1         | 1         | 1              | 1              | 1               | 1                 | 1                  | 1        | 1      | 1                          | 1                  | 0                  | 18                 |
|                                          |                    | 32  | 0       | 0                 | 0       | 0               | 0              | 0               | 0         | 0                    | 0                | 0                  | 0               | 0              | 0        | 0         | 0         | 0              | 0              | 0               | 0                 | 0                  | 0        | 0      | 0                          | 0                  | 0                  | 0                  |
|                                          | del 10-29          | 54  | 1       | 1                 | 0       | 2a              | 2a             | 2a              | 0         | 1                    | 1                | 1                  | 1               | 1              | 1        | 1         | 2b        | 2a             | 2a             | 2a              | 1                 | 1                  | 1        | 1      | 1                          | 1                  | 0                  | 22                 |
|                                          | del 11-30          | 22  | 0       | 0                 | 0       | 2b              | 2a             | 1               | 0         | 2a                   | 3                | 2a                 | 3               | 2a             | 1        | 1         | 2b        | 4              | 2b             | 4               | 2a                | 2a                 | 2a       | 1      | 1                          | 2a                 | 0                  | 20                 |
|                                          | del 3-9            | 13  | 0       | 0                 | 0       | 0               | 0              | 0               | 0         | 0                    | 0                | 0                  | 0               | 0              | 0        | 0         | 0         | 0              | 0              | 0               | 0                 | 0                  | 0        | 0      | 0                          | 0                  | 0                  | 0                  |
|                                          | del 48-49          | 35  | 0       | 0                 | 1       | 3               | 2b             | 2b              | 0         | 0                    | 3                | 3                  | 3               | 3              | 0        | 1         | 3         | 3              | 2b             | 4               | 2b                | 2a                 | 2b       | 2b     | 2b                         | 3                  | 0                  | 19                 |
|                                          |                    | 59  | 1       | 1                 | 1       | 3               | 3              | 2b              | 0         | 1                    | 4                | 4                  | 4               | 1              | 0        | 1         | 3         | 4              | 3              | 4               | 2a                | 2a                 | 2b       | 2a     | 2a                         | 3                  | 2a                 | 23                 |
|                                          | dup 13-42          | 35  | 1       | 1                 | 1       | 3               | 3              | 4               | 3         | 3                    | 3                | 3                  | 3               | 3              | 1        | 1         | 4         | 4              | 3              | 4               | 2b                | 2b                 | 2a       | 4      | 3                          | 4                  | 2b                 | 25                 |
| dup 19-41                                | 44                 | 0   | 0       | 0                 | 0       | 0               | 0              | 0               | 1         | 1                    | 1                | 1                  | 1               | 1              | 1        | 1         | 1         | 1              | 1              | 1               | 1                 | 1                  | 1        | 1      | 1                          | 1                  | 18                 |                    |
| p.Trp1281*                               | 25                 | 1   | 1       | 2b                | 4       | 4               | 4              | 1               | 2b        | 3                    | 3                | 3                  | 3               | 1              | 0        | 3         | 4         | 3              | 4              | 2b              | 2b                | 3                  | 2b       | 2b     | 2b                         | 0                  | 23                 |                    |
| p.Trp1660*                               | 31                 | 0   | 0       | 0                 | 0       | 1               | 0              | 0               | 0         | 1                    | 0                | 1                  | 0               | 0              | 0        | 1         | 0         | 0              | 0              | 0               | 0                 | 0                  | 0        | 0      | 0                          | 0                  | 4                  |                    |
| Frequency of involvement for each muscle |                    |     | 37%     | 41%               | 43%     | 55%             | 61%            | 57%             | 29%       | 47%                  | 65%              | 61%                | 65%             | 57%            | 39%      | 49%       | 71%       | 69%            | 67%            | 67%             | 53%               | 53%                | 57%      | 63%    | 65%                        | 69%                | 31%                |                    |

Cell backgrounds are color coded with darker greyscales for higher Mercuri T1w scores in the corresponding muscles. del: deletion; dup: duplication.

Supplementary table 2. Details of STIR scores in 3 upper right limb and 22 lower right limb muscles in 51 BMD patients

| Mutation group                           | Mutation           | Age | Deltoides | Biceps brachialis | Triceps | Gluteus maximus | Gluteus medius | Gluteus minimus | Ileopsoas | Tensor fasciae latae | Vastus lateralis | Vastus intermedius | Vastus medialis | Rectus femoris | Gracilis | Sartorius | Adductors | Biceps femoris | Semitendinosus | Semimembranosus | Tibialis anterior | Extensor digitorum | Peroneus | Soleus | Gastrocnemius lat. | Gastrocnemius med. | Tibialis posterior | Number of muscles involved |    |    |
|------------------------------------------|--------------------|-----|-----------|-------------------|---------|-----------------|----------------|-----------------|-----------|----------------------|------------------|--------------------|-----------------|----------------|----------|-----------|-----------|----------------|----------------|-----------------|-------------------|--------------------|----------|--------|--------------------|--------------------|--------------------|----------------------------|----|----|
|                                          |                    |     | 0         | 1                 | 2a      | 2b              | 0              | 1               | 2a        | 2b                   | 0                | 1                  | 2a              | 2b             | 0        | 1         | 2a        | 2b             | 0              | 1               | 2a                | 2b                 | 0        | 1      | 2a                 | 2b                 | 0                  |                            | 1  | 2a |
| del 45-x                                 | del 45-47          | 11  | 0         | 0                 | 1       | 1               | 1              | 2a              | 1         | 2a                   | 2a               | 2a                 | 2b              | 1              | 1        | 2a        | 2b        | 2a             | 2a             | 2a              | 1                 | 1                  | 2a       | 2a     | 2b                 | 2a                 | 0                  | 22                         |    |    |
|                                          |                    | 34  | 0         | 0                 | 2a      | 2a              | 0              | 0               | 0         | 0                    | 0                | 0                  | 1               | 2a             | 1        | 1         | 2a        | 2a             | 1              | 1               | 1                 | 1                  | 1        | 1      | 1                  | 0                  | 0                  | 1                          | 15 |    |
|                                          |                    | 41  | 1         | 1                 | 1       | 0               | 0              | 0               | 0         | 0                    | 0                | 2a                 | 0               | 0              | 2a       | 2a        | 2a        | 1              | 0              | 1               | 0                 | 2a                 | 0        | 0      | 2a                 | 2b                 | 2b                 | 0                          | 13 |    |
|                                          |                    | 45  | 2a        | 1                 | 2b      | 0               | 0              | 0               | 0         | 1                    | 1                | 0                  | 1               | 0              | 0        | 0         | 0         | 0              | 0              | 0               | 0                 | 0                  | 0        | 0      | 2a                 | 0                  | 0                  | 2a                         | 8  |    |
|                                          |                    | 47  | 1         | 1                 | 2b      | 0               | 0              | 0               | 0         | 1                    | 1                | 1                  | 0               | 0              | 2a       | 1         | 2b        | 2a             | 0              | 1               | 0                 | 2a                 | 1        | 1      | 2b                 | 2b                 | 0                  | 0                          | 1  | 17 |
|                                          |                    | 47  | 1         | 0                 | 1       | 0               | 0              | 0               | 0         | 0                    | 0                | 0                  | 0               | 0              | 0        | 0         | 1         | 0              | 0              | 0               | 0                 | 0                  | 0        | 0      | 0                  | 0                  | 0                  | 0                          | 1  | 4  |
|                                          | 56                 | 1   | 1         | 2a                | 0       | 0               | 0              | 0               | 0         | 0                    | 0                | 0                  | 0               | 0              | 0        | 0         | 0         | 0              | 0              | 0               | 2a                | 2a                 | 0        | 2a     | 0                  | 0                  | 2a                 | 7                          |    |    |
|                                          | del 45-48          | 9   | 0         | 0                 | 0       | 0               | 1              | 1               | 1         | 0                    | 1                | 1                  | 1               | 1              | 1        | 1         | 0         | 1              | 1              | 1               | 1                 | 1                  | 1        | 1      | 1                  | 1                  | 1                  | 1                          | 19 |    |
|                                          |                    | 12  | 0         | 0                 | 0       | 0               | 1              | 0               | 0         | 0                    | 0                | 0                  | 1               | 0              | 0        | 0         | 0         | 0              | 0              | 0               | 1                 | 0                  | 0        | 1      | 1                  | 1                  | 1                  | 1                          | 7  |    |
|                                          |                    | 24  | 0         | 0                 | 0       | 0               | 0              | 0               | 0         | 0                    | 0                | 1                  | 1               | 0              | 0        | 0         | 0         | 0              | 1              | 0               | 0                 | 0                  | 0        | 0      | 1                  | 1                  | 1                  | 0                          | 7  |    |
|                                          |                    | 27  | 0         | 0                 | 0       | 0               | 0              | 0               | 0         | 0                    | 0                | 0                  | 0               | 0              | 0        | 0         | 0         | 2a             | 2a             | 1               | 1                 | 0                  | 0        | 0      | 1                  | 1                  | 1                  | 1                          | 8  |    |
|                                          |                    | 37  | 0         | 0                 | 0       | 0               | 0              | 0               | 0         | 0                    | 0                | 1                  | 1               | 1              | 1        | 0         | 0         | 0              | 0              | 1               | 0                 | 0                  | 0        | 0      | 1                  | 0                  | 0                  | 0                          | 6  |    |
|                                          |                    | 37  | 0         | 0                 | 1       | 1               | 1              | 1               | 0         | 0                    | 1                | 0                  | 0               | 0              | 0        | 0         | 0         | 0              | 0              | 0               | 2b                | 0                  | 2b       | 0      | 0                  | 1                  | 2a                 | 2a                         | 1  | 11 |
|                                          |                    | 39  | 0         | 0                 | 2a      | 0               | 0              | 0               | 0         | 0                    | 2a               | 1                  | 1               | 1              | 2a       | 1         | 1         | 0              | 0              | 0               | 1                 | 1                  | 0        | 1      | 1                  | 1                  | 1                  | 1                          | 0  | 13 |
|                                          |                    | 40  | 0         | 0                 | 1       | 0               | 0              | 0               | 0         | 0                    | 0                | 0                  | 0               | 1              | 1        | 1         | 0         | 0              | 2a             | 0               | 1                 | 1                  | 1        | 1      | 1                  | 1                  | 1                  | 1                          | 1  | 12 |
|                                          |                    | 61  | 0         | 0                 | 0       | 0               | 0              | 0               | 0         | 0                    | 0                | 0                  | 0               | 0              | 0        | 0         | 0         | 0              | 0              | 0               | 0                 | 0                  | 1        | 1      | 1                  | 1                  | 1                  | 1                          | 1  | 7  |
|                                          |                    | 69  | 0         | 0                 | 0       | 0               | 0              | 0               | 0         | 0                    | 1                | 1                  | 1               | 1              | 1        | 1         | 1         | 0              | 0              | 0               | 1                 | 1                  | 1        | 1      | 1                  | 1                  | 1                  | 1                          | 1  | 14 |
|                                          | 19                 | 0   | 0         | 1                 | 0       | 0               | 0              | 0               | 0         | 1                    | 0                | 0                  | 1               | 1              | 1        | 1         | 0         | 0              | 0              | 1               | 1                 | 0                  | 0        | 0      | 1                  | 1                  | 1                  | 0                          | 9  |    |
|                                          | del 45-49          | 7   | 0         | 0                 | 0       | 0               | 0              | 0               | 0         | 0                    | 1                | 1                  | 1               | 1              | 1        | 1         | 1         | 1              | 0              | 0               | 0                 | 0                  | 0        | 1      | 1                  | 1                  | 1                  | 1                          | 13 |    |
|                                          |                    | 52  | 0         | 0                 | 0       | 0               | 0              | 0               | 0         | 0                    | 0                | 0                  | 0               | 0              | 0        | 0         | 0         | 0              | 0              | 0               | 0                 | 0                  | 0        | 0      | 1                  | 2a                 | 2a                 | 0                          | 3  |    |
| del 45-55                                | 8                  | 0   | 0         | 0                 | 0       | 0               | 0              | 0               | 0         | 0                    | 0                | 0                  | 0               | 0              | 0        | 0         | 0         | 0              | 0              | 0               | 0                 | 0                  | 0        | 0      | 0                  | 0                  | 0                  | 0                          |    |    |
|                                          | 12                 | 0   | 0         | 0                 | 0       | 0               | 0              | 0               | 0         | 0                    | 0                | 0                  | 0               | 0              | 0        | 0         | 0         | 0              | 0              | 0               | 0                 | 0                  | 0        | 0      | 0                  | 0                  | 0                  | 0                          |    |    |
|                                          | 14                 | 0   | 0         | 0                 | 0       | 0               | 0              | 0               | 0         | 0                    | 0                | 0                  | 0               | 0              | 0        | 0         | 0         | 0              | 0              | 0               | 0                 | 0                  | 0        | 0      | 0                  | 0                  | 0                  | 0                          |    |    |
|                                          | 14                 | 0   | 0         | 0                 | 0       | 0               | 0              | 0               | 0         | 0                    | 0                | 0                  | 0               | 0              | 0        | 0         | 0         | 0              | 0              | 0               | 0                 | 0                  | 0        | 0      | 0                  | 0                  | 0                  | 0                          |    |    |
|                                          | 40                 | 0   | 0         | 0                 | 0       | 0               | 0              | 0               | 0         | 0                    | 0                | 0                  | 0               | 0              | 0        | 0         | 0         | 0              | 0              | 0               | 0                 | 0                  | 0        | 0      | 0                  | 0                  | 0                  | 0                          |    |    |
|                                          | 43                 | 0   | 0         | 0                 | 0       | 0               | 0              | 0               | 0         | 0                    | 0                | 0                  | 0               | 0              | 0        | 0         | 0         | 1              | 0              | 1               | 0                 | 0                  | 0        | 2a     | 3a                 | 3a                 | 0                  | 5                          |    |    |
| del x-51                                 | del 34-51          | 50  | 0         | 0                 | 0       | 0               | 0              | 0               | 0         | 1                    | 1                | 1                  | 0               | 0              | 0        | 0         | 1         | 1              | 1              | 1               | 0                 | 0                  | 0        | 1      | 1                  | 2a                 | 1                  | 10                         |    |    |
|                                          | del 45-51          | 9   | 0         | 0                 | NV      | 0               | 0              | 0               | 0         | 0                    | 0                | 0                  | 0               | 0              | 0        | 0         | 0         | 0              | 0              | 0               | 0                 | 0                  | 0        | 0      | 0                  | 0                  | 0                  | 0                          |    |    |
|                                          |                    | 16  | 0         | 0                 | 0       | 0               | 0              | 0               | 0         | 0                    | 0                | 0                  | 0               | 0              | 0        | 0         | 0         | 0              | 0              | 0               | 0                 | 0                  | 0        | 0      | 0                  | 0                  | 0                  | 0                          |    |    |
|                                          |                    | 25  | 0         | 0                 | 0       | 0               | 0              | 0               | 0         | 0                    | 0                | 0                  | 0               | 0              | 0        | 0         | 0         | 0              | 0              | 0               | 0                 | 0                  | 0        | 0      | 0                  | 0                  | 0                  | 0                          |    |    |
|                                          | del 48-51          | 42  | 0         | 0                 | 0       | 0               | 0              | 0               | 0         | 0                    | 0                | 0                  | 0               | 0              | 0        | 0         | 0         | 0              | 0              | 0               | 0                 | 0                  | 0        | 0      | 1                  | 1                  | 1                  | 1                          | 4  |    |
|                                          |                    | 13  | 0         | 0                 | 0       | 0               | 0              | 0               | 0         | 0                    | 0                | 0                  | 0               | 0              | 0        | 0         | 0         | 0              | 0              | 0               | 0                 | 0                  | 0        | 0      | 0                  | 0                  | 0                  | 0                          |    |    |
| Other                                    | c.10507-10508delAG | 17  | 1         | 2a                | 2b      | 0               | 0              | 0               | 1         | 0                    | 1                | 0                  | 0               | 1              | 1        | 1         | 1         | 0              | 1              | 0               | 1                 | 1                  | 1        | 2a     | 2b                 | 2b                 | 1                  | 17                         |    |    |
|                                          |                    | 21  | 2a        | 2a                | 2b      | 0               | 0              | 0               | 0         | 1                    | 0                | 0                  | 0               | 0              | 2b       | 0         | 1         | 0              | 2a             | 0               | 1                 | 1                  | 1        | 2b     | 2b                 | 2b                 | 1                  | 14                         |    |    |
|                                          |                    | 35  | 0         | 0                 | 0       | 0               | 0              | 0               | 0         | 0                    | 0                | 0                  | 0               | 0              | 0        | 0         | 0         | 0              | 0              | 0               | 0                 | 0                  | 0        | 0      | 0                  | 0                  | 0                  | 0                          |    |    |
|                                          | p.Gly1433Gly       | 46  | 0         | 0                 | 0       | 0               | 0              | 0               | 0         | 0                    | 0                | 0                  | 0               | 0              | 0        | 0         | 0         | 0              | 0              | 0               | 0                 | 0                  | 0        | 0      | 1                  | 1                  | 1                  | 1                          | 4  |    |
|                                          |                    | 48  | 0         | 0                 | 0       | 0               | 0              | 0               | 0         | 0                    | 1                | 1                  | 1               | 1              | 1        | 1         | 0         | 0              | 1              | 1               | 1                 | 1                  | 1        | 1      | 1                  | 0                  | 0                  | 1                          | 13 |    |
|                                          |                    | 52  | 0         | 0                 | 0       | 0               | 0              | 0               | 0         | 1                    | 1                | 1                  | 1               | 0              | 2a       | 1         | 1         | 0              | 1              | 1               | 2a                | 1                  | 0        | 2a     | 3b                 | 0                  | 1                  | 14                         |    |    |
|                                          | c.676-678delAAG    | 54  | 0         | 0                 | 1       | 0               | 1              | 0               | 0         | 2a                   | 1                | 1                  | 3b              | 2a             | 2a       | 1         | 1         | 2b             | 2b             | 2a              | 1                 | 1                  | 1        | 1      | 0                  | 0                  | 1                  | 18                         |    |    |
|                                          |                    | 26  | 0         | 0                 | 0       | 0               | 0              | 0               | 0         | 0                    | 0                | 0                  | 0               | 0              | 0        | 0         | 1         | 1              | 1              | 1               | 1                 | 1                  | 1        | 1      | 1                  | 1                  | 1                  | 0                          | 10 |    |
|                                          |                    | 32  | 0         | 0                 | 0       | 0               | 0              | 0               | 0         | 0                    | 2a               | 0                  | 2a              | 2a             | 0        | 0         | 1         | 2a             | 2a             | 2a              | 0                 | 0                  | 0        | 1      | 1                  | 1                  | 1                  | 0                          | 10 |    |
|                                          | del 10-25          | 54  | 0         | 0                 | 0       | 0               | 0              | 0               | 0         | 0                    | 0                | 0                  | 0               | 0              | 0        | 0         | 0         | 0              | 0              | 0               | 0                 | 1                  | 1        | 1      | 1                  | 1                  | 1                  | 0                          | 6  |    |
|                                          |                    | 22  | 0         | 0                 | 1       | 0               | 0              | 0               | 0         | 0                    | 1                | 1                  | 1               | 1              | 1        | 1         | 1         | 1              | 1              | 1               | 1                 | 1                  | 1        | 1      | 2a                 | 1                  | 1                  | 18                         |    |    |
|                                          | del 11-30          | 13  | 0         | 0                 | 0       | 0               | 0              | 0               | 0         | 0                    | 0                | 0                  | 0               | 0              | 0        | 0         | 0         | 0              | 0              | 0               | 0                 | 0                  | 0        | 0      | 0                  | 0                  | 0                  | 0                          | 0  |    |
|                                          |                    | 35  | 1         | 1                 | 2a      | 1               | 1              | 1               | 0         | 0                    | 1                | 1                  | 1               | 1              | 1        | 1         | 1         | 0              | 1              | 0               | 2a                | 2a                 | 1        | 2b     | 2b                 | 2a                 | 1                  | 21                         |    |    |
|                                          | del 48-49          | 59  | 1         | 1                 | 1       | 1               | 0              | 0               | 0         | 0                    | 0                | 0                  | 0               | 1              | 1        | 1         | 1         | 0              | 0              | 1               | 1                 | 1                  | 1        | 2a     | 1                  | 2b                 | 1                  | 15                         |    |    |
|                                          |                    | 35  | 0         | 0                 | 0       | 0               | 0              | 0               | 0         | 0                    | 1                | 1                  | 1               | 1              | 1        | 1         | 0         | 0              | 1              | 0               | 2b                | 2b                 | 2b       | 2b     | 2b                 | 0                  | 2b                 | 13                         |    |    |
|                                          | dup 13-42          | 44  | 0         | 0                 | 0       | 0               | 0              | 0               | 0         | 0                    | 0                | 0                  | 0               | 0              | 0        | 0         | 0         | 0              | 0              | 0               | 0                 | 1                  | 1        | 1      | 1                  | 1                  | 2a                 | 1                          | 7  |    |
|                                          |                    | 25  | 1         | 1                 | 2a      | 1               | 1              | 1               | 1         | 1                    | 1                | 1                  | 1               | 1              | 0        | 1         | 1         | 0              | 1              | 0               | 1                 | 1                  | 1        | 1      | 1                  | 1                  | 1                  | 1                          | 22 |    |
|                                          | p.Trp1281*         | 31  | 0         | 0                 | 0       | 0               | 0              | 0               | 0         | 0                    | 1                | 1                  | 1               | 1              | 1        | 1         | 1         | 1              | 1              | 1               | 1                 | 0                  | 0        | 0      | 0                  | 0                  | 0                  | 0                          | 10 |    |
| p.Trp1660*                               | 31                 | 0   | 0         | 0                 | 0       | 0               | 0              | 0               | 0         | 1                    | 1                | 1                  | 1               | 1              | 1        | 1         | 1         | 1              | 1              | 1               | 0                 | 0                  | 0        | 0      | 0                  | 0                  | 0                  | 10                         |    |    |
| Frequency of involvement for each muscle |                    |     | 20%       | 18%               | 35%     | 12%             | 14%            | 12%             | 8%        | 10%                  | 45%              | 35%                | 37%             | 43%            | 39%      | 41%       | 37%       | 25%            | 43%            | 27%             | 51%               | 43%                | 39%      | 73%    | 63%                | 57%                | 53%                |                            |    |    |

Cell backgrounds are color coded with darker greyscales for higher levels of STIR signal in the corresponding muscles. del: deletion; dup: duplication.
